# Supplementary material for: Water sources as reservoirs of Vibrio choleraeO1 and non-O1 strains in Bepanda, Douala (Cameroon): relationship between isolation and physico-chemical factors
Source: PubMed Central journal article supplement (PMC4131033; doi:10.1186/1471-2334-14-421), 2014-07-30

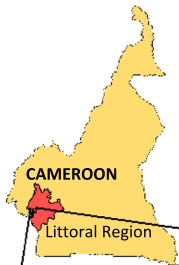

9°43'50"E

9°44'0"E

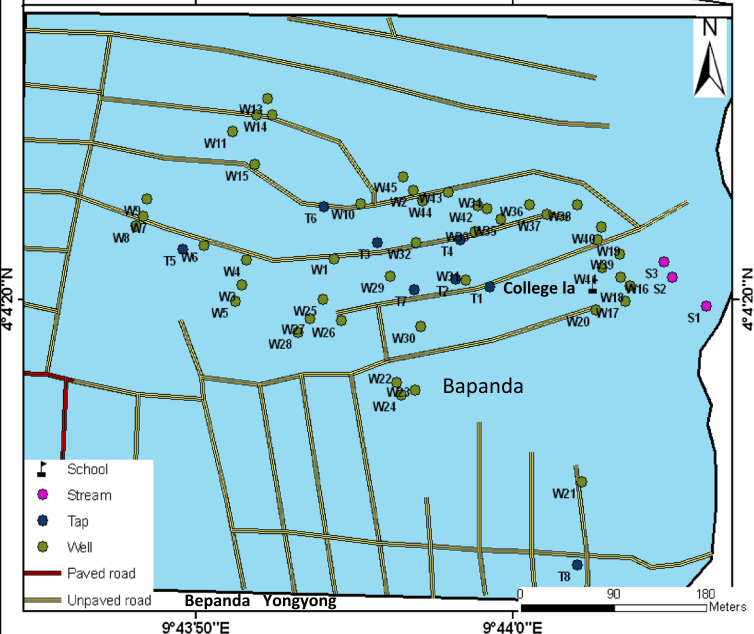

Supplement: 12879_2013_3727_MOESM4_ESM.pdf [file 12879_2013_3727_MOESM4_ESM.pdf]
